# Supplementary material for: A New Bibliometric Index Based on the Shape of the Citation Distribution
Source: PubMed Central journal article supplement (PMC4277364; doi:10.1371/journal.pone.0115962), 2014-12-26
Supplement: pone.0115962.s001.pdf [file pone.0115962.s001.pdf]

## Appendix S1. Proofs.

### Lemma 1

If  $a, b \in \mathbb{N}$  and  $a, b > 0$ , then  $\lambda(a, b) = \ln(1 + \frac{a}{b}) b$  is an increasing function of  $b$ .

*Proof*

Since by hypothesis  $\frac{a+b}{b} > 1$ , and since  $\partial_b(\lambda(a, b)) = \ln(\frac{a+b}{b}) + \frac{b}{a+b} - 1$ , it is sufficient to prove that the function  $\xi(z) = \ln(z) + z^{-1} - 1 > 0 \forall z > 1$ . This follows from the fact that  $\xi(1) = 0$  and  $\xi'(z) = (z-1) \cdot z^{-2} > 0 \forall z > 1$ .

Note: in the following proofs we refer without loss of generality to  $L$  instead of  $l$ : indeed, because  $l$  is a monotone transformation of  $L$ , the results hold true for both of them.

Denote with  $\mathbf{u}_\downarrow$  the non-increasing re-arrangement of the vector  $\mathbf{u} = (u_1, \dots, u_n)$ , so that if  $\mathbf{v} = (v_1, \dots, v_n) = \mathbf{u}_\downarrow$  then  $v_1 \geq v_2 \geq \dots \geq v_n$ .

### Property 1

If  $\mathbf{x} = (x_1, \dots, x_{n_x})$  and  $\mathbf{y} = (x_1, \dots, x_k + 1, \dots, x_{n_x})_\downarrow$  then  $l(\mathbf{y}) > l(\mathbf{x})$ .

*Proof*

Consider the two possible cases: 1)  $k > n_x^*$  and 2)  $k \leq n_x^*$ .

Suppose  $h^*(\mathbf{x}) = h^*(\mathbf{y}) = h^*$ .

1.  $L(\mathbf{y}) - L(\mathbf{x}) = \sum_{i=1}^{h^*+1} [\lambda(x_i, y_i^*) - \lambda(x_i, x_i^*)]$ .

As  $C_y > C_x$  then  $y_i^* \geq x_i^*$  for  $i = 1, \dots, h^*$  and there exists at least one element, say  $y_j^*$ ,  $j \in \{1, \dots, h^*\}$ , such that  $y_j^* > x_j^*$ . Thus Lemma 1 yields  $\lambda(x_i, y_i^*) - \lambda(x_i, x_i^*) \geq 0$ , for any  $i = 1, \dots, h^*$  and  $\lambda(x_j, y_j^*) - \lambda(x_j, x_j^*) > 0$ . Hence  $L(\mathbf{y}) - L(\mathbf{x}) > 0$  and we obtain the thesis.

2.  $L(\mathbf{y}) - L(\mathbf{x}) = \sum_{i \neq k} [\lambda(x_i, y_i^*) - \lambda(x_i, x_i^*)] + \lambda(x_k + 1, y_k^*) - \lambda(x_k, x_k^*)$ , where  $\sum_{i \neq k} [\lambda(x_i, y_i^*) - \lambda(x_i, x_i^*)] > 0$  for point i). Moreover,  $\lambda(a, b)$  is also an increasing function of  $a$ , thus  $\lambda(x_k + 1, y_k^*) - \lambda(x_k, x_k^*) > 0$  which yields the thesis.

Suppose  $h^*(\mathbf{x}) < h^*(\mathbf{y})$ , then the thesis holds true *a fortiori*.

**Property 2**

Let  $\mathbf{x} = (x_1, \dots, x_{n_x})$ ,  $\mathbf{y} = (x_1, \dots, x_u + 1, \dots, x_{n_x})_{\downarrow}$  and  $\mathbf{w} = (x_1, \dots, x_v + 1, \dots, x_n)_{\downarrow}$ . If  $u \leq n_x^* < v$ , then  $l(\mathbf{y}) > l(\mathbf{w})$ .

*Proof*

Clearly,  $\mathbf{y}^* = \mathbf{w}^*$  and  $h^*(\mathbf{y}) = h^*(\mathbf{w}) = h^*$ .

$$\begin{aligned}
L(\mathbf{y}) - L(\mathbf{w}) &= \\
&= \sum_{i \neq u} \lambda(x_i, y_i^*) + \lambda(x_u + 1, y_u^*) - \sum_{i=1}^{h^*+1} \lambda(x_i, y_i^*) = \\
&= \sum_{i \neq u} \lambda(x_i, y_i^*) + \lambda(x_u + 1, y_u^*) - \sum_{i \neq u} \lambda(x_i, y_i^*) - \lambda(x_u, y_u^*) = \\
&= \lambda(x_u + 1, y_u^*) - \lambda(x_u, y_u^*). \tag{1}
\end{aligned}$$

As  $\lambda(a, b)$  is an increasing function of  $a$ ,  $\lambda(x_u + 1, y_u^*) - \lambda(x_u, y_u^*) > 0$  which yields the thesis.

**Property 3**

Let  $\mathbf{x} = (x_1, \dots, x_{n_x})$ ,  $\mathbf{y} = (x_1, \dots, x_u + 1, \dots, x_{n_x})_{\downarrow}$  and  $\mathbf{w} = (x_1, \dots, x_v + 1, \dots, x_{n_x})_{\downarrow}$  and suppose  $x_v \neq x_u$ . If  $u < v \leq h^*(\mathbf{x})$  then  $l(\mathbf{y}) < l(\mathbf{w})$ .

*Proof*

Clearly,  $\mathbf{y}^* = \mathbf{w}^*$  and  $h^*(\mathbf{y}) = h^*(\mathbf{w}) = h^*$ .

$$\begin{aligned}
L(\mathbf{y}) - L(\mathbf{w}) &= \\
&= \sum_{i \neq k, l} \lambda(x_i, x_i^*) + \lambda(x_u + 1, x_u^*) + \lambda(x_v, x_v^*) + \\
&- \sum_{i \neq u, v} \lambda(x_i, x_i^*) - \lambda(x_u, x_u^*) - \lambda(x_v + 1, x_v^*) = \\
&= \lambda(x_u + 1, x_u^*) + \lambda(x_v, x_v^*) - \lambda(x_u, x_u^*) - \lambda(x_v + 1, x_v^*) = \\
&= \delta(u) - \delta(v), \tag{2}
\end{aligned}$$

where  $\delta(u) = \lambda(x_u + 1, x_u^*) - \lambda(x_u, x_u^*) = x_u^* \ln \frac{x_u^* + x_u + 1}{x_u^* + x_u}$  and  $\delta(l) = \lambda(x_v + 1, x_v^*) - \lambda(x_v, x_v^*) = x_v^* \ln \frac{x_v^* + x_v + 1}{x_v^* + x_v}$ .

We need to prove that  $\delta(u) - \delta(l) < 0$ . Note that, for all integer numbers  $m < n$ ,  $\frac{m+1}{m} > \frac{n+1}{n}$ . Thus, as  $x_u^* \geq x_v^*$  and  $x_u > x_v$  we derive that:

$$\frac{x_u^* + x_u + 1}{x_u^* + x_u} < \frac{x_v^* + x_v + 1}{x_v^* + x_v}, \quad (3)$$

which yields  $\delta(u) < \delta(v)$  or equivalently  $\delta(u) - \delta(v) < 0$ .

#### Property 4

If  $\mathbf{x} = (x_1, \dots, x_{n_x})$  and  $\mathbf{y} = (x_1, \dots, x_u - 1, \dots, x_v + 1, \dots, x_{n_x})_{\downarrow}$  where  $u < v \leq h^*(\mathbf{x})$  and  $x_v < x_u$ , then  $l(\mathbf{y}) \geq l(\mathbf{x})$ . Strict inequality holds if  $x_u - x_v \geq 2$ .

*Proof*

The proof is similar to the proof of property 3.

Clearly,  $\mathbf{y}^* = \mathbf{x}^*$  and  $h^*(\mathbf{y}) = h^*(\mathbf{x}) = h^*$ .

$$\begin{aligned} L(\mathbf{y}) - L(\mathbf{x}) &= \\ &= \sum_{i \neq u, v} \lambda(x_i, x_i^*) + \lambda(x_u - 1, x_u^*) + \lambda(x_v + 1, x_v^*) + \\ &- \sum_{i \neq u, v} \lambda(x_i, x_i^*) - \lambda(x_u, x_u^*) - \lambda(x_v, x_v^*) = \\ &= \lambda(x_u - 1, x_u^*) - \lambda(x_u, x_u^*) + \lambda(x_v + 1, x_v^*) - \lambda(x_v, x_v^*) = \\ &= -\delta(u) + \delta(v), \end{aligned} \quad (4)$$

where  $\delta(k) = \lambda(x_u, x_u^*) - \lambda(x_u - 1, x_u^*) = x_u^* \ln \frac{(x_u^* + x_u - 1) + 1}{x_u^* + x_u - 1}$  and  $\delta(l) = \lambda(x_v + 1, x_v^*) - \lambda(x_v, x_v^*) = x_v^* \ln \frac{x_v^* + x_v + 1}{x_v^* + x_v}$ .

We need to prove that  $-\delta(u) + \delta(v) > 0$ . For all integer numbers  $m \leq n$ ,  $\frac{m+1}{m} \geq \frac{n+1}{n}$ . Thus, as  $x_u^* \geq x_v^*$  and  $x_u - 1 \geq x_v$  we derive that:

$$\frac{(x_u^* + x_u - 1) + 1}{x_u^* + x_u - 1} \leq \frac{x_v^* + x_v + 1}{x_v^* + x_v}, \quad (5)$$

which yields  $\delta(u) \leq \delta(v)$  or equivalently  $-\delta(u) + \delta(v) \geq 0$ . If  $x_u - x_v \geq 2$  it is trivial to derive that

$$l(\mathbf{y}) > l(\mathbf{x}).$$
